# Supplementary material for: Native-state proteomics of Parvalbumin interneurons identifies unique molecular signatures and vulnerabilities to early Alzheimer’s pathology
Source: PubMed Central journal article supplement (PMC10985119; doi:10.1038/s41467-024-47028-7), 2024-04-01
Supplement: 41467_2024_47028_MOESM3_ESM.pdf [file 41467_2024_47028_MOESM3_ESM.pdf]

## **Description of Additional Supplementary Files**

**File Name: Supplementary Data 1**

**Description:** LFQ-MS data related to Figure 1: PV-IN proteome.

**File Name: Supplementary Data 2**

**Description:** LFQ-MS data related to Figure 2: PV-IN vs Camk2a CIBOP proteome.

**File Name: Supplementary Data 3**

**Description:** Neuronal subtype marker lists used for analyses in Figure 3.

**File Name: Supplementary Data 4**

**Description:** Mouse TMT-MS data related to Figure 4.

**File Name: Supplementary Data 5**

**Description:** PV-CIBOP in 3 mo 5xFAD and WT mice: Bulk and SA-enriched proteomes and associated analyses, related to Figure 5.

**File Name: Supplementary Data 6**

**Description:** Analysis of protein half-life distribution in PV-IN DEPs (5xFAD vs. WT CIBOP), related to Figure 7.

**File Name: Supplementary Data 7**

**Description:** List of reagents including antibodies.
